# Supplementary material
Source: PubMed Central journal article supplement (PMC6178231)
Supplement: NIHMS1508075-supplement-1.pdf [file NIHMS1508075-supplement-1.pdf]

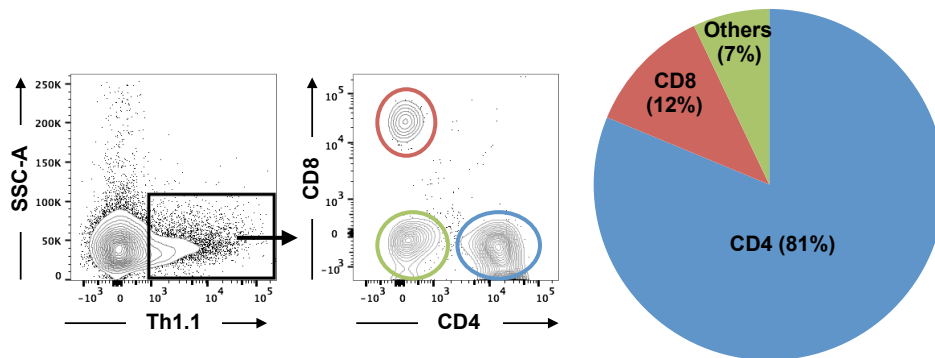

**Supplemental Figure 1:** CD4<sup>+</sup> T cells are the major source of IFN- $\gamma$ . Thy1.1 IFN- $\gamma$  reporter mice were infected in the skin with  $10^6$  *L. major* and 2 weeks post infection mice were euthanized. Thy1.1 positive cells were checked for the expression of CD4<sup>+</sup> and CD8<sup>+</sup> T cell surface markers (representative flow plots, left) and percentages are represented in a pie chart (right) (n = 4 mice). Flow plots pregated on live/singlets/Thy1.1/CD8 $\beta$  or CD4.

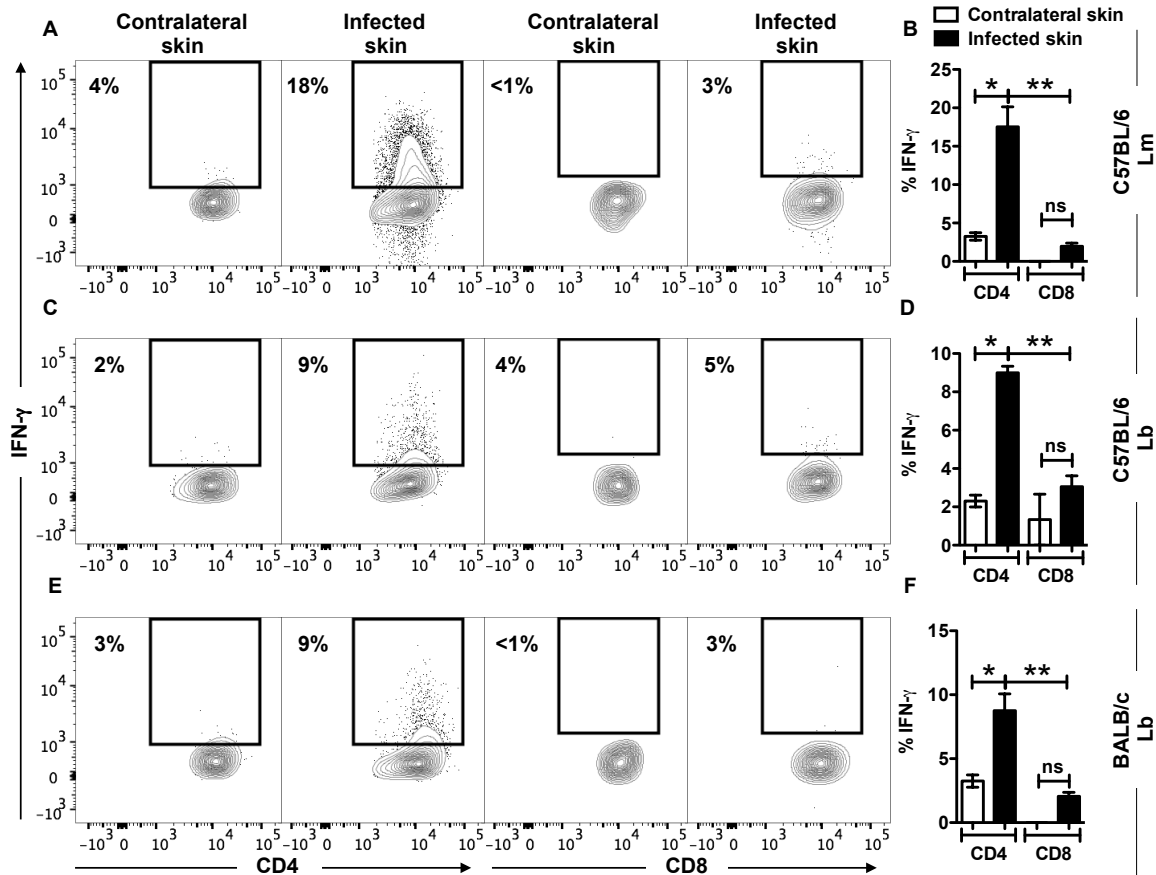

**Supplemental Figure 2:** CD8<sup>+</sup> T cells do not produce IFN- $\gamma$  protein in the skin in response to *L. major* and *L. braziliensis*. C57BL/6 or BALB/c mice were infected in the skin with  $10^6$  *L. major* or  $10^5$  *L. braziliensis* and 5 weeks post infection mice were euthanized. Cells from the contralateral and infected skin were cultured for 6 hours in BFA and the expression of IFN- $\gamma$  in CD4<sup>+</sup> and CD8<sup>+</sup> T cells was measured by flow cytometry. Depicted are (A, C and E) representative contour plots and (B, D and F) bar graphs showing the percentage of IFN- $\gamma$  expressing CD4<sup>+</sup> and CD8<sup>+</sup> T cells. (A and B) C57BL/6 infected with *L. major*. (C and D) C57BL/6 infected with *L. braziliensis*. (E and F) BALB/c infected with *L. braziliensis*. Flow plots pre-gated on live/singlets/CD3/CD8 $\beta$  or CD4. Representative data from 3 or more independent experiments (n = 5 mice per group) with similar results are presented. \* $p \leq 0.05$  or \*\* $p \leq 0.01$ ; ns, non-significant
